# Supplementary material for: Inhibition of CSF1R, a receptor involved in microglia viability, alters behavioral and molecular changes induced by cocaine
Source: PubMed Central journal article supplement (PMC8346567; doi:10.1038/s41598-021-95059-7), 2021-08-06
Supplement: 41598_2021_95059_MOESM4_ESM.pdf [file 41598_2021_95059_MOESM4_ESM.pdf]

| Supplementary Table 1          |                     |        |                     |        |                     |        |
|--------------------------------|---------------------|--------|---------------------|--------|---------------------|--------|
|                                | Cocaine factor      |        | PLX3397 factor      |        | Interaction         |        |
| <b>GDNF</b><br><i>Striatum</i> | F <sub>(1,21)</sub> | p      | F <sub>(1,21)</sub> | p      | F <sub>(1,21)</sub> | p      |
| Two-way ANOVA                  | 0.76                | 0.3920 | 0.18                | 0.6720 | 1.10                | 0.3051 |
| <b>GDNF</b><br><i>HIP</i>      | F <sub>(1,22)</sub> | p      | F <sub>(1,22)</sub> | p      | F <sub>(1,22)</sub> | p      |
| Two-way ANOVA                  | 2.04                | 0.1666 | 0.59                | 0.4489 | 0.36                | 0.5501 |
| <b>GDNF</b><br><i>PFC</i>      | F <sub>(1,22)</sub> | p      | F <sub>(1,22)</sub> | p      | F <sub>(1,22)</sub> | p      |
| Two-way ANOVA                  | 12.46               | 0.0019 | 0.36                | 0.5498 | 0.30                | 0.5891 |
| <b>NGF</b><br><i>Striatum</i>  | F <sub>(1,23)</sub> | p      | F <sub>(1,23)</sub> | p      | F <sub>(1,23)</sub> | p      |
| Two-way ANOVA                  | 0.02                | 0.8870 | 0.001               | 0.9696 | 2.04                | 0.1665 |
| <b>NGF</b><br><i>HIP</i>       | F <sub>(1,20)</sub> | p      | F <sub>(1,20)</sub> | p      | F <sub>(1,20)</sub> | p      |
| Two-way ANOVA                  | 0.002               | 0.9872 | 0.005               | 0.9438 | 0.31                | 0.5827 |
| <b>NGF</b><br><i>PFC</i>       | F <sub>(1,15)</sub> | p      | F <sub>(1,15)</sub> | p      | F <sub>(1,15)</sub> | p      |
| Two-way ANOVA                  | 7.19                | 0.0171 | 0.03                | 0.8449 | 3.21                | 0.0930 |

Abbreviations: HIP: hippocampus; NA core: nucleus accumbens core; NA shell: nucleus accumbens shell; PFC: prefrontal cortex
